# Supplementary material for: FTY720 Inhibits Expansion of Breast Cancer Stem Cells via PP2A Activation
Source: Int J Mol Sci. 2021 Jul 6;22(14):7259. doi: 10.3390/ijms22147259 (PMC8329924; doi:10.3390/ijms22147259)
Supplement: Supplementary file 1 [file ijms-22-07259-s001.zip › ijms-1267504-SI.pdf]

**Table S1. Cell viability of FTY720-treated cells.** After treatment with FTY720 for 72 h, number of the ALDH-negative and -positive cells in MCF-7 cells (left) and MDA-MB-231 cells (right) were assessed using the Aldefluor assay kit and flow cytometry. Cell viability was indicated as percent of control. Data represent mean  $\pm$  s.d. (n = 3).

| cell line<br>$\mu$ M | MCF-7          |                 | MDA-MB-231     |                 |
|----------------------|----------------|-----------------|----------------|-----------------|
|                      | ALDH (-)       | ALDH (+)        | ALDH (-)       | ALDH (+)        |
| 0.1                  | 88.2 $\pm$ 5.2 | 83.5 $\pm$ 31.0 | 93.2 $\pm$ 5.9 | 99.7 $\pm$ 56.9 |
| 1                    | 72.5 $\pm$ 4.0 | 69.3 $\pm$ 8.7  | 72.9 $\pm$ 9.9 | 34.0 $\pm$ 6.0  |
| 3                    | 64.3 $\pm$ 3.4 | 35.2 $\pm$ 4.9  | 59.4 $\pm$ 2.9 | 21.6 $\pm$ 8.0  |

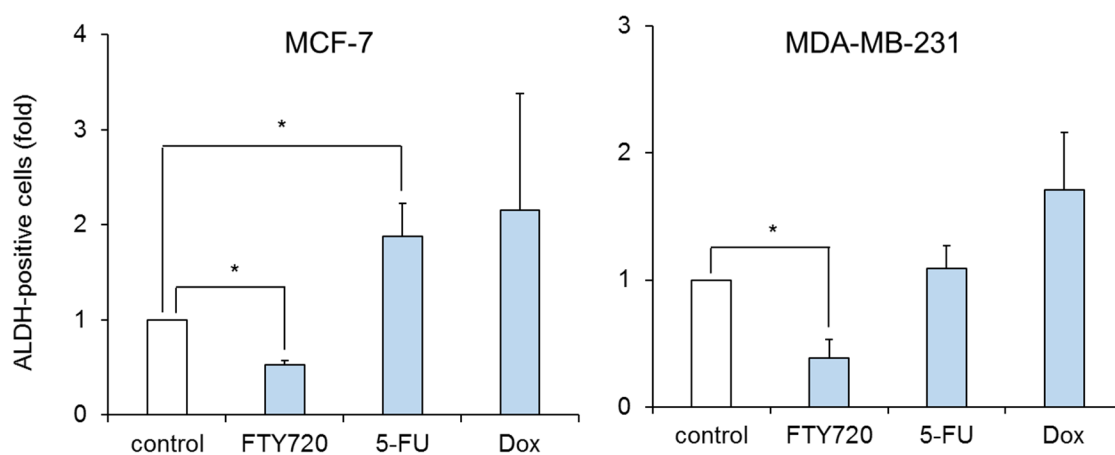

**Figure S1. Comparison of FTY720 with anti-cancer drug 5-FU and doxorubicin.** After treatment with FTY720 (3  $\mu$ M), 5-FU (10  $\mu$ M) or Dox (1  $\mu$ M) for 72 h, the ALDH-positive cells of MCF-7 cells (left) and MDA-MB-231 cells (right) were assessed using the Aldefluor assay kit and flow cytometry. Data represent mean  $\pm$  s.d. (n = 3). \*  $p$  < 0.05.

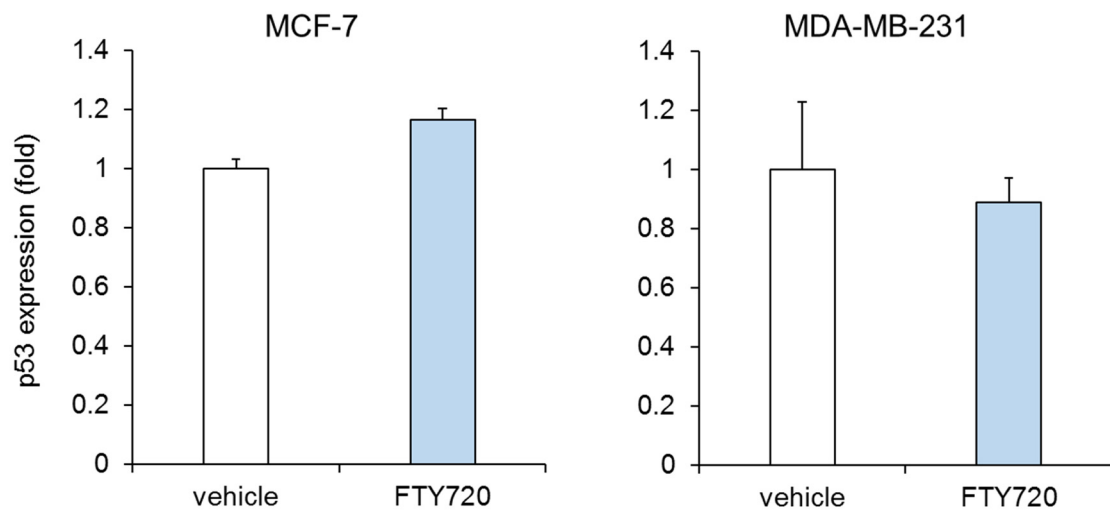

**Figure S2. Effect of FTY720 on tumor suppressor p53 expression.** After treatment with FTY720 ( $3 \mu\text{M}$ ) for 48 h, expression level of p53 in MCF-7 cells (left) and MDA-MB-231 cells (right) were measured by real-time RT-PCR. Data represent mean  $\pm$  s.d. (n = 3).
